# Supplementary material for: Distinct seasonal changes and precession forcing of surface and subsurface temperatures in the mid-latitudinal North Atlantic during the onset of the Late Pliocene
Source: Copernicus journal article supplement (doi:10.5194/egusphere-2024-603), 2024-03-07
Supplement: Supplementary file 1 [file egusphere-2024-603-supplement.pdf]

## Supplementary Figures

### **Distinct seasonal changes and precession forcing of surface and subsurface temperatures in the mid-latitude North Atlantic during the onset of the Late Pliocene**

**Xiaolei Pang<sup>1,2</sup>, Antje H. L. Voelker<sup>3,4</sup>, Sihua Lu<sup>5</sup>, Xuan Ding<sup>6</sup>**

<sup>1</sup>Institute of Ocean Research, Peking University, Beijing, 100871, China

<sup>2</sup>School of Earth and Space Sciences, Peking University, Beijing, 100871, China

<sup>3</sup>Instituto Português do Mar e da Atmosfera, Divisão de Geologia e Georecursos Marinhos, Av. Doutor Alfredo Magalhães Ramalho 6, 1495-165 Alges, Portugal

<sup>4</sup>Centro de Ciências do Mar do Algarve (CCMAR), Universidade do Algarve, Campus de Gambelas, Edf. 7, 8005-139 Faro, Portugal

<sup>5</sup>State Joint Key Laboratory of Environmental Simulation and Pollution Control, College of Environmental Sciences and Engineering, Peking University, Beijing, 100871, China

<sup>6</sup>School of Ocean Sciences, China University of Geosciences (Beijing), Beijing, 100083, China

*Correspondence to:* Xiaolei Pang (xiaolei.pang@pku.edu.cn)

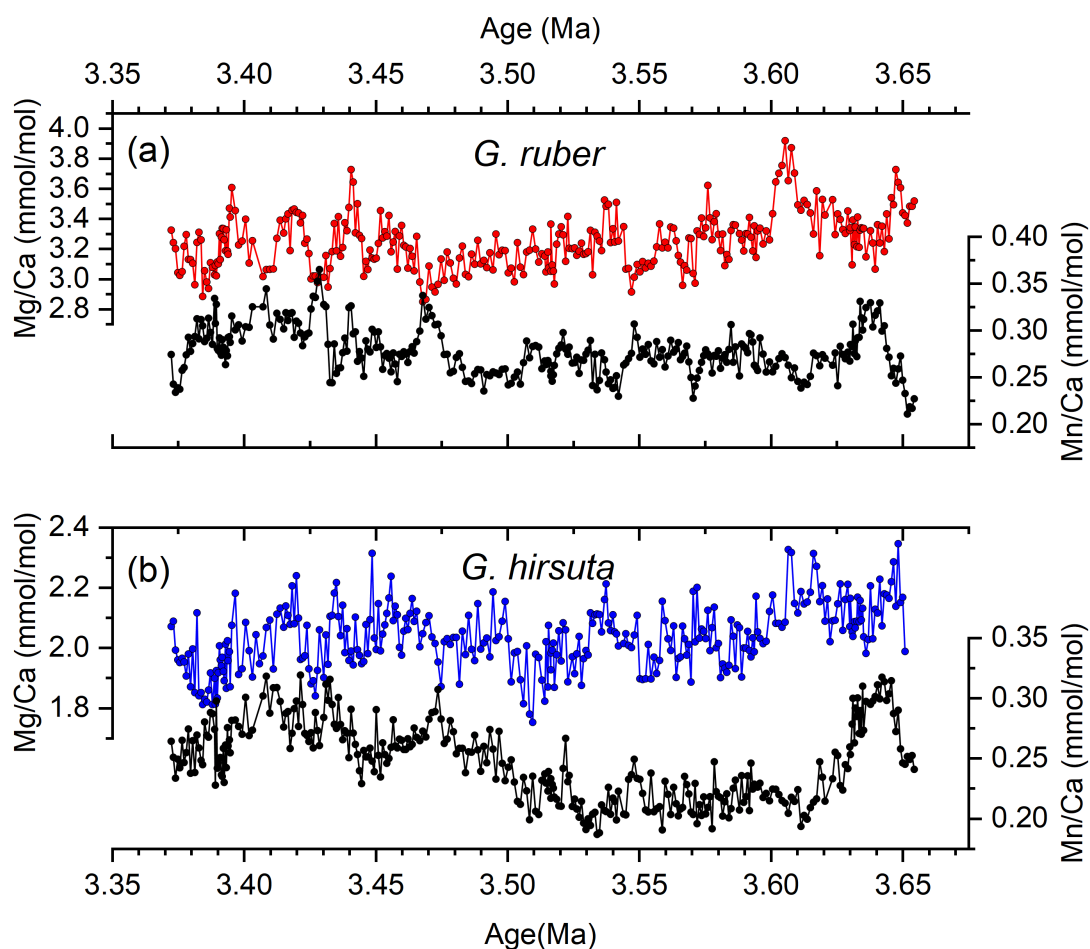

**Figure S1.** Site U1313 downcore Mg/Ca in comparison with Mn/Ca of species *G. ruber* white (a) and *G. hirsuta* (b). No corresponding anomalies were found.

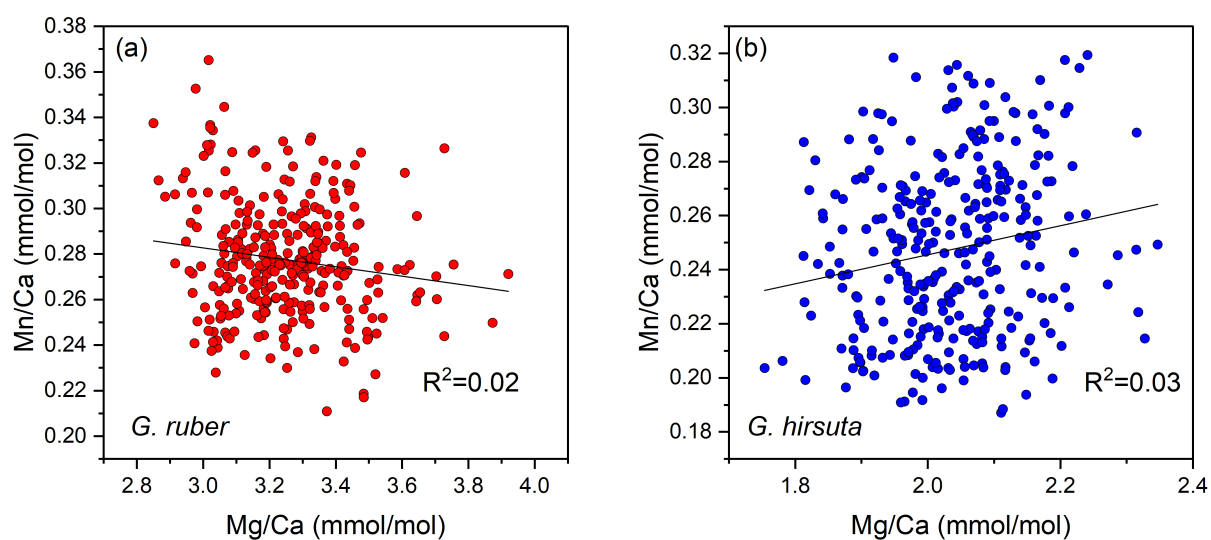

**Figure S2.** Scatter plots of Mg/Ca versus Mn/Ca for species *G. ruber* white (a) and *G. hirsuta* (b). Black line indicates the best linear fit, respectively. No significant relationship between Mg/Ca and Mn/Ca is observed for either species.

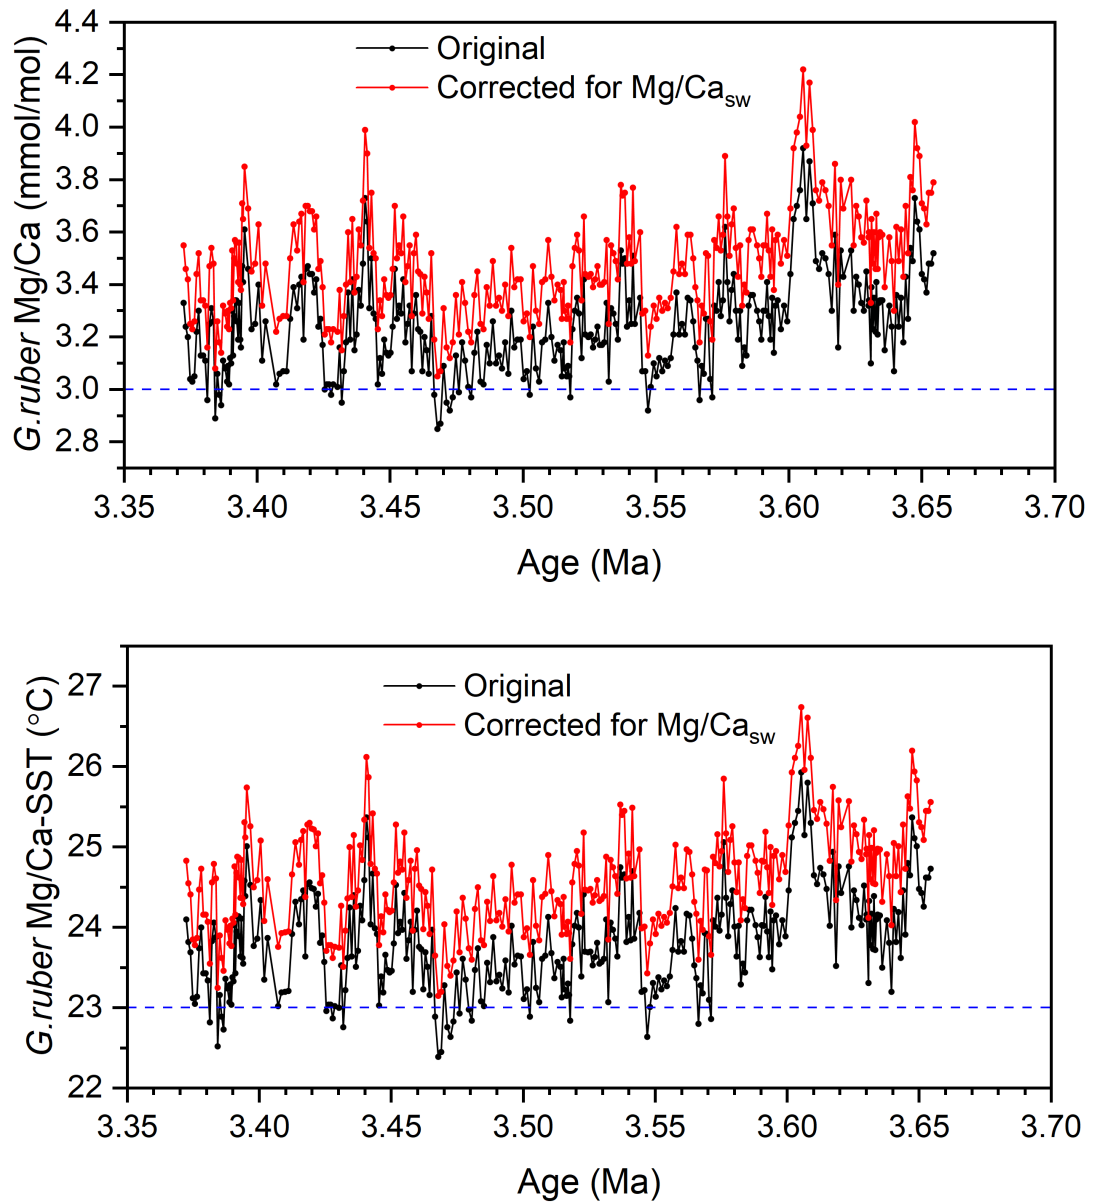

**Figure S3.** The upper panel displays the comparison between original *G. ruber* Mg/Ca ratios (black) and the Mg/Ca ratios (red) corrected for the secular changes in the seawater of Mg/Ca ( $Mg/Ca_{sw}$ ), dashed line indicate the core top *G. ruber* Mg/Ca ratios from nearby core SU90-03. The lower panel shows the corresponding Mg/Ca-based SST records derived from the both original and corrected Mg/Ca ratios. The dashed line represents the modern summer SST of 23 °C at Site U1313.
